# Supplementary material for: Seasonal dynamics of seed dormancy and germination in the weed Diplachne fusca
Source: PeerJ. 2024 Aug 30;12:e17987. doi: 10.7717/peerj.17987 (PMC11368092; doi:10.7717/peerj.17987)
Supplement: Supplemental Information 1 — Each data point indicates the percentage of seeds germinated. [file peerj-12-17987-s001.xlsx]

## Sheet: Phenology—raw
Year-Month	light	Temp	Germination%
2018-10	dark	4	0
2018-11	dark	4	0
2018-12	dark	4	0
2019-1	dark	4	0
2019-2	dark	4	0
2019-3	dark	4	4
2019-4	dark	4	0
2019-5	dark	4	0
2019-6	dark	4	0
2019-7	dark	4	0
2019-8	dark	4	0
2019-9	dark	4	0
2019-10	dark	4	0
2019-11	dark	4	0
2019-12	dark	4	0
2020-1	dark	4	2
2020-2	dark	4	0
2020-3	dark	4	0
2020-4	dark	4	1
2020-5	dark	4	0
2020-6	dark	4	0
2020-7	dark	4	8
2020-8	dark	4	1
2020-9	dark	4	0
2020-10	dark	4	0
2018-10	light	4	0
2018-11	light	4	0
2018-12	light	4	0
2019-1	light	4	20
2019-2	light	4	36
2019-3	light	4	46
2019-4	light	4	78
2019-5	light	4	88
2019-6	light	4	84
2019-7	light	4	10
2019-8	light	4	6
2019-9	light	4	0
2019-10	light	4	0
2019-11	light	4	0
2019-12	light	4	0
2020-1	light	4	22
2020-2	light	4	59
2020-3	light	4	62
2020-4	light	4	66
2020-5	light	4	91
2020-6	light	4	77
2020-7	light	4	51
2020-8	light	4	12
2020-9	light	4	8
2020-10	light	4	5
2018-10	dark	5/15	0
2018-11	dark	5/15	0
2018-12	dark	5/15	0
2019-1	dark	5/15	0
2019-2	dark	5/15	0
2019-3	dark	5/15	8
2019-4	dark	5/15	0
2019-5	dark	5/15	0
2019-6	dark	5/15	0
2019-7	dark	5/15	0
2019-8	dark	5/15	0
2019-9	dark	5/15	1
2019-10	dark	5/15	0
2019-11	dark	5/15	0
2019-12	dark	5/15	1
2020-1	dark	5/15	4
2020-2	dark	5/15	9
2020-3	dark	5/15	12
2020-4	dark	5/15	9
2020-5	dark	5/15	3
2020-6	dark	5/15	2
2020-7	dark	5/15	0
2020-8	dark	5/15	2
2020-9	dark	5/15	0
2020-10	dark	5/15	0
2018-10	light	5/15	0
2018-11	light	5/15	0
2018-12	light	5/15	12
2019-1	light	5/15	39
2019-2	light	5/15	72
2019-3	light	5/15	79
2019-4	light	5/15	95
2019-5	light	5/15	94
2019-6	light	5/15	90
2019-7	light	5/15	38
2019-8	light	5/15	15
2019-9	light	5/15	12
2019-10	light	5/15	7
2019-11	light	5/15	7
2019-12	light	5/15	14
2020-1	light	5/15	49
2020-2	light	5/15	60
2020-3	light	5/15	82
2020-4	light	5/15	94
2020-5	light	5/15	92
2020-6	light	5/15	100
2020-7	light	5/15	68
2020-8	light	5/15	23
2020-9	light	5/15	3
2020-10	light	5/15	3
2018-10	dark	10/20	0
2018-11	dark	10/20	0
2018-12	dark	10/20	0
2019-1	dark	10/20	0
2019-2	dark	10/20	0
2019-3	dark	10/20	8
2019-4	dark	10/20	0
2019-5	dark	10/20	0
2019-6	dark	10/20	0
2019-7	dark	10/20	0
2019-8	dark	10/20	0
2019-9	dark	10/20	0
2019-10	dark	10/20	0
2019-11	dark	10/20	0
2019-12	dark	10/20	1
2020-1	dark	10/20	8
2020-2	dark	10/20	12
2020-3	dark	10/20	13
2020-4	dark	10/20	7
2020-5	dark	10/20	5
2020-6	dark	10/20	0
2020-7	dark	10/20	4
2020-8	dark	10/20	1
2020-9	dark	10/20	0
2020-10	dark	10/20	0
2018-10	light	10/20	0
2018-11	light	10/20	8
2018-12	light	10/20	12
2019-1	light	10/20	49
2019-2	light	10/20	70
2019-3	light	10/20	87
2019-4	light	10/20	86
2019-5	light	10/20	84
2019-6	light	10/20	85
2019-7	light	10/20	73
2019-8	light	10/20	8
2019-9	light	10/20	4
2019-10	light	10/20	3
2019-11	light	10/20	1
2019-12	light	10/20	14
2020-1	light	10/20	58
2020-2	light	10/20	92
2020-3	light	10/20	73
2020-4	light	10/20	71
2020-5	light	10/20	84
2020-6	light	10/20	86
2020-7	light	10/20	82
2020-8	light	10/20	8
2020-9	light	10/20	1
2020-10	light	10/20	2
2018-10	dark	15/25	0
2018-11	dark	15/25	0
2018-12	dark	15/25	0
2019-1	dark	15/25	0
2019-2	dark	15/25	8
2019-3	dark	15/25	7
2019-4	dark	15/25	0
2019-5	dark	15/25	0
2019-6	dark	15/25	0
2019-7	dark	15/25	0
2019-8	dark	15/25	0
2019-9	dark	15/25	0
2019-10	dark	15/25	0
2019-11	dark	15/25	0
2019-12	dark	15/25	4
2020-1	dark	15/25	6
2020-2	dark	15/25	14
2020-3	dark	15/25	18
2020-4	dark	15/25	7
2020-5	dark	15/25	2
2020-6	dark	15/25	0
2020-7	dark	15/25	1
2020-8	dark	15/25	1
2020-9	dark	15/25	0
2020-10	dark	15/25	0
2018-10	light	15/25	0
2018-11	light	15/25	6
2018-12	light	15/25	34
2019-1	light	15/25	77
2019-2	light	15/25	83
2019-3	light	15/25	82
2019-4	light	15/25	82
2019-5	light	15/25	87
2019-6	light	15/25	83
2019-7	light	15/25	51
2019-8	light	15/25	6
2019-9	light	15/25	2
2019-10	light	15/25	4
2019-11	light	15/25	10
2019-12	light	15/25	38
2020-1	light	15/25	67
2020-2	light	15/25	86
2020-3	light	15/25	96
2020-4	light	15/25	87
2020-5	light	15/25	76
2020-6	light	15/25	74
2020-7	light	15/25	70
2020-8	light	15/25	11
2020-9	light	15/25	4
2020-10	light	15/25	0
2018-10	dark	20/30	0
2018-11	dark	20/30	1
2018-12	dark	20/30	1
2019-1	dark	20/30	0
2019-2	dark	20/30	4
2019-3	dark	20/30	0
2019-4	dark	20/30	0
2019-5	dark	20/30	0
2019-6	dark	20/30	0
2019-7	dark	20/30	0
2019-8	dark	20/30	0
2019-9	dark	20/30	0
2019-10	dark	20/30	0
2019-11	dark	20/30	0
2019-12	dark	20/30	7
2020-1	dark	20/30	10
2020-2	dark	20/30	14
2020-3	dark	20/30	9
2020-4	dark	20/30	8
2020-5	dark	20/30	0
2020-6	dark	20/30	0
2020-7	dark	20/30	1
2020-8	dark	20/30	1
2020-9	dark	20/30	0
2020-10	dark	20/30	0
2018-10	light	20/30	0
2018-11	light	20/30	12
2018-12	light	20/30	33
2019-1	light	20/30	89
2019-2	light	20/30	84
2019-3	light	20/30	80
2019-4	light	20/30	84
2019-5	light	20/30	87
2019-6	light	20/30	86
2019-7	light	20/30	49
2019-8	light	20/30	13
2019-9	light	20/30	5
2019-10	light	20/30	9
2019-11	light	20/30	1
2019-12	light	20/30	42
2020-1	light	20/30	80
2020-2	light	20/30	86
2020-3	light	20/30	92
2020-4	light	20/30	82
2020-5	light	20/30	75
2020-6	light	20/30	99
2020-7	light	20/30	57
2020-8	light	20/30	14
2020-9	light	20/30	1
2020-10	light	20/30	0
2018-10	dark	4	0
2018-11	dark	4	0
2018-12	dark	4	0
2019-1	dark	4	0
2019-2	dark	4	0
2019-3	dark	4	8
2019-4	dark	4	0
2019-5	dark	4	0
2019-6	dark	4	0
2019-7	dark	4	0
2019-8	dark	4	0
2019-9	dark	4	0
2019-10	dark	4	0
2019-11	dark	4	0
2019-12	dark	4	0
2020-1	dark	4	0
2020-2	dark	4	0
2020-3	dark	4	0
2020-4	dark	4	0
2020-5	dark	4	0
2020-6	dark	4	0
2020-7	dark	4	0
2020-8	dark	4	1
2020-9	dark	4	0
2020-10	dark	4	0
2018-10	light	4	0
2018-11	light	4	0
2018-12	light	4	0
2019-1	light	4	19
2019-2	light	4	34
2019-3	light	4	44
2019-4	light	4	81
2019-5	light	4	75
2019-6	light	4	91
2019-7	light	4	10
2019-8	light	4	6
2019-9	light	4	0
2019-10	light	4	0
2019-11	light	4	0
2019-12	light	4	8
2020-1	light	4	23
2020-2	light	4	51
2020-3	light	4	65
2020-4	light	4	67
2020-5	light	4	81
2020-6	light	4	78
2020-7	light	4	54
2020-8	light	4	13
2020-9	light	4	9
2020-10	light	4	5
2018-10	dark	5/15	0
2018-11	dark	5/15	0
2018-12	dark	5/15	0
2019-1	dark	5/15	0
2019-2	dark	5/15	0
2019-3	dark	5/15	8
2019-4	dark	5/15	0
2019-5	dark	5/15	0
2019-6	dark	5/15	0
2019-7	dark	5/15	0
2019-8	dark	5/15	0
2019-9	dark	5/15	1
2019-10	dark	5/15	0
2019-11	dark	5/15	0
2019-12	dark	5/15	1
2020-1	dark	5/15	4
2020-2	dark	5/15	9
2020-3	dark	5/15	12
2020-4	dark	5/15	9
2020-5	dark	5/15	3
2020-6	dark	5/15	2
2020-7	dark	5/15	0
2020-8	dark	5/15	2
2020-9	dark	5/15	0
2020-10	dark	5/15	0
2018-10	light	5/15	0
2018-11	light	5/15	0
2018-12	light	5/15	12
2019-1	light	5/15	40
2019-2	light	5/15	78
2019-3	light	5/15	80
2019-4	light	5/15	70
2019-5	light	5/15	76
2019-6	light	5/15	89
2019-7	light	5/15	39
2019-8	light	5/15	15
2019-9	light	5/15	11
2019-10	light	5/15	5
2019-11	light	5/15	7
2019-12	light	5/15	9
2020-1	light	5/15	40
2020-2	light	5/15	57
2020-3	light	5/15	89
2020-4	light	5/15	78
2020-5	light	5/15	93
2020-6	light	5/15	74
2020-7	light	5/15	63
2020-8	light	5/15	21
2020-9	light	5/15	3
2020-10	light	5/15	3
2018-10	dark	10/20	0
2018-11	dark	10/20	0
2018-12	dark	10/20	0
2019-1	dark	10/20	0
2019-2	dark	10/20	0
2019-3	dark	10/20	8
2019-4	dark	10/20	0
2019-5	dark	10/20	0
2019-6	dark	10/20	0
2019-7	dark	10/20	0
2019-8	dark	10/20	0
2019-9	dark	10/20	0
2019-10	dark	10/20	0
2019-11	dark	10/20	0
2019-12	dark	10/20	1
2020-1	dark	10/20	6
2020-2	dark	10/20	15
2020-3	dark	10/20	13
2020-4	dark	10/20	7
2020-5	dark	10/20	5
2020-6	dark	10/20	0
2020-7	dark	10/20	4
2020-8	dark	10/20	1
2020-9	dark	10/20	0
2020-10	dark	10/20	0
2018-10	light	10/20	0
2018-11	light	10/20	8
2018-12	light	10/20	11
2019-1	light	10/20	61
2019-2	light	10/20	78
2019-3	light	10/20	88
2019-4	light	10/20	88
2019-5	light	10/20	91
2019-6	light	10/20	85
2019-7	light	10/20	43
2019-8	light	10/20	8
2019-9	light	10/20	4
2019-10	light	10/20	3
2019-11	light	10/20	1
2019-12	light	10/20	13
2020-1	light	10/20	57
2020-2	light	10/20	91
2020-3	light	10/20	85
2020-4	light	10/20	72
2020-5	light	10/20	81
2020-6	light	10/20	93
2020-7	light	10/20	79
2020-8	light	10/20	11
2020-9	light	10/20	1
2020-10	light	10/20	2
2018-10	dark	15/25	0
2018-11	dark	15/25	0
2018-12	dark	15/25	0
2019-1	dark	15/25	0
2019-2	dark	15/25	8
2019-3	dark	15/25	7
2019-4	dark	15/25	0
2019-5	dark	15/25	0
2019-6	dark	15/25	0
2019-7	dark	15/25	0
2019-8	dark	15/25	0
2019-9	dark	15/25	0
2019-10	dark	15/25	0
2019-11	dark	15/25	0
2019-12	dark	15/25	4
2020-1	dark	15/25	6
2020-2	dark	15/25	14
2020-3	dark	15/25	18
2020-4	dark	15/25	7
2020-5	dark	15/25	2
2020-6	dark	15/25	0
2020-7	dark	15/25	1
2020-8	dark	15/25	1
2020-9	dark	15/25	0
2020-10	dark	15/25	0
2018-10	light	15/25	0
2018-11	light	15/25	6
2018-12	light	15/25	35
2019-1	light	15/25	79
2019-2	light	15/25	72
2019-3	light	15/25	79
2019-4	light	15/25	83
2019-5	light	15/25	80
2019-6	light	15/25	79
2019-7	light	15/25	61
2019-8	light	15/25	6
2019-9	light	15/25	2
2019-10	light	15/25	4
2019-11	light	15/25	9
2019-12	light	15/25	41
2020-1	light	15/25	61
2020-2	light	15/25	91
2020-3	light	15/25	96
2020-4	light	15/25	75
2020-5	light	15/25	75
2020-6	light	15/25	54
2020-7	light	15/25	82
2020-8	light	15/25	12
2020-9	light	15/25	4
2020-10	light	15/25	0
2018-10	dark	20/30	0
2018-11	dark	20/30	1
2018-12	dark	20/30	0
2019-1	dark	20/30	0
2019-2	dark	20/30	12
2019-3	dark	20/30	0
2019-4	dark	20/30	0
2019-5	dark	20/30	0
2019-6	dark	20/30	0
2019-7	dark	20/30	0
2019-8	dark	20/30	0
2019-9	dark	20/30	0
2019-10	dark	20/30	0
2019-11	dark	20/30	0
2019-12	dark	20/30	2
2020-1	dark	20/30	7
2020-2	dark	20/30	4
2020-3	dark	20/30	9
2020-4	dark	20/30	13
2020-5	dark	20/30	2
2020-6	dark	20/30	0
2020-7	dark	20/30	3
2020-8	dark	20/30	2
2020-9	dark	20/30	0
2020-10	dark	20/30	0
2018-10	light	20/30	0
2018-11	light	20/30	12
2018-12	light	20/30	54
2019-1	light	20/30	74
2019-2	light	20/30	84
2019-3	light	20/30	95
2019-4	light	20/30	84
2019-5	light	20/30	76
2019-6	light	20/30	91
2019-7	light	20/30	44
2019-8	light	20/30	11
2019-9	light	20/30	6
2019-10	light	20/30	9
2019-11	light	20/30	1
2019-12	light	20/30	42
2020-1	light	20/30	75
2020-2	light	20/30	86
2020-3	light	20/30	91
2020-4	light	20/30	94
2020-5	light	20/30	78
2020-6	light	20/30	98
2020-7	light	20/30	83
2020-8	light	20/30	14
2020-9	light	20/30	1
2020-10	light	20/30	0
2018-10	dark	4	0
2018-11	dark	4	0
2018-12	dark	4	0
2019-1	dark	4	0
2019-2	dark	4	0
2019-3	dark	4	0
2019-4	dark	4	0
2019-5	dark	4	0
2019-6	dark	4	0
2019-7	dark	4	0
2019-8	dark	4	0
2019-9	dark	4	0
2019-10	dark	4	0
2019-11	dark	4	0
2019-12	dark	4	0
2020-1	dark	4	4
2020-2	dark	4	0
2020-3	dark	4	0
2020-4	dark	4	2
2020-5	dark	4	0
2020-6	dark	4	0
2020-7	dark	4	6
2020-8	dark	4	1
2020-9	dark	4	0
2020-10	dark	4	0
2018-10	light	4	0
2018-11	light	4	0
2018-12	light	4	0
2019-1	light	4	20
2019-2	light	4	37
2019-3	light	4	47
2019-4	light	4	77
2019-5	light	4	84
2019-6	light	4	93
2019-7	light	4	11
2019-8	light	4	6
2019-9	light	4	0
2019-10	light	4	0
2019-11	light	4	0
2019-12	light	4	2
2020-1	light	4	21
2020-2	light	4	58
2020-3	light	4	65
2020-4	light	4	69
2020-5	light	4	77
2020-6	light	4	79
2020-7	light	4	53
2020-8	light	4	14
2020-9	light	4	8
2020-10	light	4	5
2018-10	dark	5/15	0
2018-11	dark	5/15	0
2018-12	dark	5/15	0
2019-1	dark	5/15	0
2019-2	dark	5/15	0
2019-3	dark	5/15	8
2019-4	dark	5/15	0
2019-5	dark	5/15	0
2019-6	dark	5/15	0
2019-7	dark	5/15	0
2019-8	dark	5/15	0
2019-9	dark	5/15	1
2019-10	dark	5/15	0
2019-11	dark	5/15	0
2019-12	dark	5/15	1
2020-1	dark	5/15	4
2020-2	dark	5/15	9
2020-3	dark	5/15	12
2020-4	dark	5/15	9
2020-5	dark	5/15	3
2020-6	dark	5/15	2
2020-7	dark	5/15	0
2020-8	dark	5/15	2
2020-9	dark	5/15	0
2020-10	dark	5/15	0
2018-10	light	5/15	0
2018-11	light	5/15	0
2018-12	light	5/15	13
2019-1	light	5/15	40
2019-2	light	5/15	64
2019-3	light	5/15	78
2019-4	light	5/15	96
2019-5	light	5/15	86
2019-6	light	5/15	91
2019-7	light	5/15	43
2019-8	light	5/15	14
2019-9	light	5/15	11
2019-10	light	5/15	6
2019-11	light	5/15	7
2019-12	light	5/15	11
2020-1	light	5/15	39
2020-2	light	5/15	64
2020-3	light	5/15	83
2020-4	light	5/15	95
2020-5	light	5/15	92
2020-6	light	5/15	74
2020-7	light	5/15	75
2020-8	light	5/15	24
2020-9	light	5/15	2
2020-10	light	5/15	3
2018-10	dark	10/20	0
2018-11	dark	10/20	0
2018-12	dark	10/20	0
2019-1	dark	10/20	0
2019-2	dark	10/20	0
2019-3	dark	10/20	9
2019-4	dark	10/20	0
2019-5	dark	10/20	0
2019-6	dark	10/20	0
2019-7	dark	10/20	0
2019-8	dark	10/20	0
2019-9	dark	10/20	0
2019-10	dark	10/20	0
2019-11	dark	10/20	0
2019-12	dark	10/20	1
2020-1	dark	10/20	4
2020-2	dark	10/20	12
2020-3	dark	10/20	19
2020-4	dark	10/20	7
2020-5	dark	10/20	5
2020-6	dark	10/20	0
2020-7	dark	10/20	4
2020-8	dark	10/20	1
2020-9	dark	10/20	0
2020-10	dark	10/20	0
2018-10	light	10/20	0
2018-11	light	10/20	8
2018-12	light	10/20	12
2019-1	light	10/20	68
2019-2	light	10/20	59
2019-3	light	10/20	81
2019-4	light	10/20	69
2019-5	light	10/20	76
2019-6	light	10/20	84
2019-7	light	10/20	61
2019-8	light	10/20	8
2019-9	light	10/20	4
2019-10	light	10/20	2
2019-11	light	10/20	1
2019-12	light	10/20	18
2020-1	light	10/20	79
2020-2	light	10/20	60
2020-3	light	10/20	76
2020-4	light	10/20	71
2020-5	light	10/20	77
2020-6	light	10/20	100
2020-7	light	10/20	84
2020-8	light	10/20	11
2020-9	light	10/20	1
2020-10	light	10/20	2
2018-10	dark	15/25	0
2018-11	dark	15/25	0
2018-12	dark	15/25	0
2019-1	dark	15/25	0
2019-2	dark	15/25	8
2019-3	dark	15/25	7
2019-4	dark	15/25	0
2019-5	dark	15/25	0
2019-6	dark	15/25	0
2019-7	dark	15/25	0
2019-8	dark	15/25	0
2019-9	dark	15/25	0
2019-10	dark	15/25	0
2019-11	dark	15/25	0
2019-12	dark	15/25	4
2020-1	dark	15/25	6
2020-2	dark	15/25	14
2020-3	dark	15/25	18
2020-4	dark	15/25	7
2020-5	dark	15/25	2
2020-6	dark	15/25	0
2020-7	dark	15/25	1
2020-8	dark	15/25	1
2020-9	dark	15/25	0
2020-10	dark	15/25	0
2018-10	light	15/25	0
2018-11	light	15/25	6
2018-12	light	15/25	34
2019-1	light	15/25	82
2019-2	light	15/25	100
2019-3	light	15/25	81
2019-4	light	15/25	84
2019-5	light	15/25	71
2019-6	light	15/25	78
2019-7	light	15/25	56
2019-8	light	15/25	6
2019-9	light	15/25	2
2019-10	light	15/25	4
2019-11	light	15/25	9
2019-12	light	15/25	40
2020-1	light	15/25	56
2020-2	light	15/25	98
2020-3	light	15/25	63
2020-4	light	15/25	86
2020-5	light	15/25	68
2020-6	light	15/25	74
2020-7	light	15/25	73
2020-8	light	15/25	10
2020-9	light	15/25	3
2020-10	light	15/25	0
2018-10	dark	20/30	0
2018-11	dark	20/30	1
2018-12	dark	20/30	2
2019-1	dark	20/30	0
2019-2	dark	20/30	11
2019-3	dark	20/30	0
2019-4	dark	20/30	0
2019-5	dark	20/30	0
2019-6	dark	20/30	0
2019-7	dark	20/30	0
2019-8	dark	20/30	0
2019-9	dark	20/30	0
2019-10	dark	20/30	0
2019-11	dark	20/30	0
2019-12	dark	20/30	3
2020-1	dark	20/30	3
2020-2	dark	20/30	15
2020-3	dark	20/30	21
2020-4	dark	20/30	5
2020-5	dark	20/30	5
2020-6	dark	20/30	3
2020-7	dark	20/30	3
2020-8	dark	20/30	1
2020-9	dark	20/30	0
2020-10	dark	20/30	0
2018-10	light	20/30	0
2018-11	light	20/30	12
2018-12	light	20/30	29
2019-1	light	20/30	72
2019-2	light	20/30	84
2019-3	light	20/30	85
2019-4	light	20/30	85
2019-5	light	20/30	68
2019-6	light	20/30	82
2019-7	light	20/30	46
2019-8	light	20/30	12
2019-9	light	20/30	6
2019-10	light	20/30	6
2019-11	light	20/30	1
2019-12	light	20/30	43
2020-1	light	20/30	78
2020-2	light	20/30	86
2020-3	light	20/30	90
2020-4	light	20/30	85
2020-5	light	20/30	84
2020-6	light	20/30	80
2020-7	light	20/30	70
2020-8	light	20/30	14
2020-9	light	20/30	1
2020-10	light	20/30	0
2018-10	dark	4	0
2018-11	dark	4	0
2018-12	dark	4	0
2019-1	dark	4	0
2019-2	dark	4	0
2019-3	dark	4	4
2019-4	dark	4	0
2019-5	dark	4	0
2019-6	dark	4	0
2019-7	dark	4	0
2019-8	dark	4	0
2019-9	dark	4	0
2019-10	dark	4	0
2019-11	dark	4	0
2019-12	dark	4	0
2020-1	dark	4	2
2020-2	dark	4	0
2020-3	dark	4	0
2020-4	dark	4	0
2020-5	dark	4	0
2020-6	dark	4	0
2020-7	dark	4	5
2020-8	dark	4	1
2020-9	dark	4	0
2020-10	dark	4	0
2018-10	light	4	0
2018-11	light	4	0
2018-12	light	4	0
2019-1	light	4	21
2019-2	light	4	34
2019-3	light	4	48
2019-4	light	4	76
2019-5	light	4	73
2019-6	light	4	89
2019-7	light	4	10
2019-8	light	4	6
2019-9	light	4	0
2019-10	light	4	0
2019-11	light	4	0
2019-12	light	4	6
2020-1	light	4	22
2020-2	light	4	52
2020-3	light	4	64
2020-4	light	4	78
2020-5	light	4	76
2020-6	light	4	78
2020-7	light	4	49
2020-8	light	4	13
2020-9	light	4	7
2020-10	light	4	5
2018-10	dark	5/15	0
2018-11	dark	5/15	0
2018-12	dark	5/15	0
2019-1	dark	5/15	0
2019-2	dark	5/15	0
2019-3	dark	5/15	8
2019-4	dark	5/15	0
2019-5	dark	5/15	0
2019-6	dark	5/15	0
2019-7	dark	5/15	0
2019-8	dark	5/15	0
2019-9	dark	5/15	1
2019-10	dark	5/15	0
2019-11	dark	5/15	0
2019-12	dark	5/15	1
2020-1	dark	5/15	4
2020-2	dark	5/15	9
2020-3	dark	5/15	12
2020-4	dark	5/15	9
2020-5	dark	5/15	3
2020-6	dark	5/15	2
2020-7	dark	5/15	0
2020-8	dark	5/15	2
2020-9	dark	5/15	0
2020-10	dark	5/15	0
2018-10	light	5/15	0
2018-11	light	5/15	0
2018-12	light	5/15	12
2019-1	light	5/15	40
2019-2	light	5/15	78
2019-3	light	5/15	83
2019-4	light	5/15	75
2019-5	light	5/15	84
2019-6	light	5/15	93
2019-7	light	5/15	40
2019-8	light	5/15	16
2019-9	light	5/15	10
2019-10	light	5/15	6
2019-11	light	5/15	7
2019-12	light	5/15	14
2020-1	light	5/15	35
2020-2	light	5/15	63
2020-3	light	5/15	82
2020-4	light	5/15	93
2020-5	light	5/15	92
2020-6	light	5/15	95
2020-7	light	5/15	66
2020-8	light	5/15	23
2020-9	light	5/15	4
2020-10	light	5/15	3
2018-10	dark	10/20	0
2018-11	dark	10/20	0
2018-12	dark	10/20	0
2019-1	dark	10/20	0
2019-2	dark	10/20	0
2019-3	dark	10/20	7
2019-4	dark	10/20	0
2019-5	dark	10/20	0
2019-6	dark	10/20	0
2019-7	dark	10/20	0
2019-8	dark	10/20	0
2019-9	dark	10/20	0
2019-10	dark	10/20	0
2019-11	dark	10/20	0
2019-12	dark	10/20	1
2020-1	dark	10/20	5
2020-2	dark	10/20	9
2020-3	dark	10/20	18
2020-4	dark	10/20	7
2020-5	dark	10/20	5
2020-6	dark	10/20	0
2020-7	dark	10/20	4
2020-8	dark	10/20	1
2020-9	dark	10/20	0
2020-10	dark	10/20	0
2018-10	light	10/20	0
2018-11	light	10/20	8
2018-12	light	10/20	12
2019-1	light	10/20	62
2019-2	light	10/20	73
2019-3	light	10/20	73
2019-4	light	10/20	80
2019-5	light	10/20	93
2019-6	light	10/20	86
2019-7	light	10/20	63
2019-8	light	10/20	8
2019-9	light	10/20	4
2019-10	light	10/20	3
2019-11	light	10/20	1
2019-12	light	10/20	19
2020-1	light	10/20	62
2020-2	light	10/20	76
2020-3	light	10/20	61
2020-4	light	10/20	70
2020-5	light	10/20	86
2020-6	light	10/20	93
2020-7	light	10/20	80
2020-8	light	10/20	10
2020-9	light	10/20	1
2020-10	light	10/20	2
2018-10	dark	15/25	0
2018-11	dark	15/25	0
2018-12	dark	15/25	0
2019-1	dark	15/25	0
2019-2	dark	15/25	8
2019-3	dark	15/25	7
2019-4	dark	15/25	0
2019-5	dark	15/25	0
2019-6	dark	15/25	0
2019-7	dark	15/25	0
2019-8	dark	15/25	0
2019-9	dark	15/25	0
2019-10	dark	15/25	0
2019-11	dark	15/25	0
2019-12	dark	15/25	4
2020-1	dark	15/25	6
2020-2	dark	15/25	14
2020-3	dark	15/25	18
2020-4	dark	15/25	7
2020-5	dark	15/25	2
2020-6	dark	15/25	2
2020-7	dark	15/25	1
2020-8	dark	15/25	1
2020-9	dark	15/25	0
2020-10	dark	15/25	0
2018-10	light	15/25	0
2018-11	light	15/25	7
2018-12	light	15/25	37
2019-1	light	15/25	82
2019-2	light	15/25	72
2019-3	light	15/25	78
2019-4	light	15/25	91
2019-5	light	15/25	82
2019-6	light	15/25	80
2019-7	light	15/25	71
2019-8	light	15/25	6
2019-9	light	15/25	2
2019-10	light	15/25	4
2019-11	light	15/25	8
2019-12	light	15/25	41
2020-1	light	15/25	72
2020-2	light	15/25	97
2020-3	light	15/25	74
2020-4	light	15/25	68
2020-5	light	15/25	70
2020-6	light	15/25	66
2020-7	light	15/25	62
2020-8	light	15/25	10
2020-9	light	15/25	5
2020-10	light	15/25	0
2018-10	dark	20/30	0
2018-11	dark	20/30	1
2018-12	dark	20/30	0
2019-1	dark	20/30	0
2019-2	dark	20/30	5
2019-3	dark	20/30	0
2019-4	dark	20/30	0
2019-5	dark	20/30	0
2019-6	dark	20/30	0
2019-7	dark	20/30	0
2019-8	dark	20/30	0
2019-9	dark	20/30	0
2019-10	dark	20/30	0
2019-11	dark	20/30	0
2019-12	dark	20/30	4
2020-1	dark	20/30	8
2020-2	dark	20/30	15
2020-3	dark	20/30	25
2020-4	dark	20/30	7
2020-5	dark	20/30	0
2020-6	dark	20/30	5
2020-7	dark	20/30	0
2020-8	dark	20/30	1
2020-9	dark	20/30	0
2020-10	dark	20/30	0
2018-10	light	20/30	0
2018-11	light	20/30	12
2018-12	light	20/30	44
2019-1	light	20/30	85
2019-2	light	20/30	84
2019-3	light	20/30	88
2019-4	light	20/30	68
2019-5	light	20/30	89
2019-6	light	20/30	81
2019-7	light	20/30	45
2019-8	light	20/30	12
2019-9	light	20/30	6
2019-10	light	20/30	7
2019-11	light	20/30	1
2019-12	light	20/30	41
2020-1	light	20/30	79
2020-2	light	20/30	86
2020-3	light	20/30	87
2020-4	light	20/30	87
2020-5	light	20/30	74
2020-6	light	20/30	88
2020-7	light	20/30	66
2020-8	light	20/30	14
2020-9	light	20/30	1
2020-10	light	20/30	0

## Sheet: Lab_raw
Cold stratification weeks	Temperature	light	Germination%			Temperature	Dry storage Weeks	Germination%			Temperature	GA concentration	Germination%
0	10/20	light	0			20/30	0	12			20/30	0	8
0	10/20	dark	0			20/30	2	32			20/30	0.01	32
0	10/20	light	0			20/30	4	20			20/30	0.1	56
0	10/20	dark	0			20/30	8	80			20/30	0.5	44
0	10/20	light	0			20/30	12	92			20/30	0	12
0	10/20	dark	0			20/30	0	12			20/30	0.01	48
0	10/20	light	0			20/30	2	16			20/30	0.1	44
0	10/20	dark	0			20/30	4	32			20/30	0.5	56
0	15/25	light	12			20/30	8	80			20/30	0	0
0	15/25	dark	0			20/30	12	96			20/30	0.01	12
0	15/25	light	8			20/30	0	16			20/30	0.1	56
0	15/25	dark	0			20/30	2	28			20/30	0.5	84
0	15/25	light	12			20/30	4	40			20/30	0	0
0	15/25	dark	0			20/30	8	76			20/30	0.01	56
0	15/25	light	4			20/30	12	92			20/30	0.1	76
0	15/25	dark	0			20/30	0	8			20/30	0.5	60
0	20/30	light	4			20/30	2	20
0	20/30	dark	0			20/30	4	52
0	20/30	light	0			20/30	8	84
0	20/30	dark	0			20/30	12	96
0	20/30	light	8
0	20/30	dark	4
0	20/30	light	0
0	20/30	dark	0
0	5/15	light	0
0	5/15	dark	0
0	5/15	light	0
0	5/15	dark	0
0	5/15	light	0
0	5/15	dark	0
0	5/15	light	0
0	5/15	dark	0
2	10/20	light	12
2	10/20	dark	4
2	10/20	light	16
2	10/20	dark	0
2	10/20	light	8
2	10/20	dark	0
2	10/20	light	12
2	10/20	dark	4
2	15/25	light	48
2	15/25	dark	0
2	15/25	light	32
2	15/25	dark	0
2	15/25	light	40
2	15/25	dark	0
2	15/25	light	32
2	15/25	dark	0
2	20/30	light	44
2	20/30	dark	4
2	20/30	light	32
2	20/30	dark	4
2	20/30	light	12
2	20/30	dark	4
2	20/30	light	36
2	20/30	dark	4
2	5/15	light	20
2	5/15	dark	0
2	5/15	light	0
2	5/15	dark	0
2	5/15	light	12
2	5/15	dark	0
2	5/15	light	12
2	5/15	dark	0
4	10/20	light	44
4	10/20	dark	4
4	10/20	light	60
4	10/20	dark	4
4	10/20	light	48
4	10/20	dark	4
4	10/20	light	44
4	10/20	dark	4
4	15/25	light	52
4	15/25	dark	8
4	15/25	light	60
4	15/25	dark	8
4	15/25	light	44
4	15/25	dark	8
4	15/25	light	64
4	15/25	dark	4
4	20/30	light	92
4	20/30	dark	8
4	20/30	light	84
4	20/30	dark	16
4	20/30	light	88
4	20/30	dark	0
4	20/30	light	64
4	20/30	dark	4
4	5/15	light	24
4	5/15	dark	0
4	5/15	light	28
4	5/15	dark	0
4	5/15	light	28
4	5/15	dark	0
4	5/15	light	24
4	5/15	dark	0
8	10/20	light	68
8	10/20	dark	12
8	10/20	light	80
8	10/20	dark	8
8	10/20	light	40
8	10/20	dark	16
8	10/20	light	100
8	10/20	dark	12
8	15/25	light	84
8	15/25	dark	4
8	15/25	light	72
8	15/25	dark	4
8	15/25	light	88
8	15/25	dark	4
8	15/25	light	84
8	15/25	dark	12
8	20/30	light	96
8	20/30	dark	16
8	20/30	light	88
8	20/30	dark	16
8	20/30	light	76
8	20/30	dark	32
8	20/30	light	92
8	20/30	dark	28
8	5/15	light	64
8	5/15	dark	0
8	5/15	light	48
8	5/15	dark	0
8	5/15	light	56
8	5/15	dark	0
8	5/15	light	56
8	5/15	dark	0
